# Supplementary material for: The C–H···S–S hydrogen bonding in diethyl disulfide⋯difluoromethane: a combined microwave spectroscopic and computational study
Source: Royal Society of Chemistry journal article supplement (doi:10.1039/d4cp03994g), 2024-01-01
Supplement: d4cp03994g1.pdf [file d4cp03994g1.pdf]

## Supporting Information

### **The C–H···S–S Hydrogen bonding in Diethyl Disulfide···Difluoromethane: A Combined Microwave Spectroscopic and Computational Study**

Wenqi Lv, Jinxi Huang, Haiying Huang, Liuting Wang, Tingting Yang, and Gang Feng\*

School of Chemistry and Chemical Engineering, Chongqing University, Chongqing, 401331,

China.

## **Contents:**

**Figure S1.** Shapes and relative energies ( $\Delta E_0$  in  $\text{kJ mol}^{-1}$ ) of the five most stable isomers of DEFS- $\text{CH}_2\text{F}_2$  calculated at the B3LYP-D3(BJ)/def2-TZVP level of theory.

**Table S1.** Spectroscopic parameters of the energy minima of the DEFS- $\text{CH}_2\text{F}_2$  complex calculated at the B3LYP-D3(BJ)/def2-TZVP level of theory.

**Table S2** Partial  $r_0$  and B3LYP-D3(BJ)/def2-TZVP calculated geometries of the observed isomer **I** of DEFS- $\text{CH}_2\text{F}_2$ .

**Table S3.** NBO stabilization energy contributions ( $\geq 0.21$   $\text{kJ/mol}$ ) for the isomer **I** of the DEFS- $\text{CH}_2\text{F}_2$  complex calculated at B3LYP-D3(BJ)/def2-TZVP level of theory.

**Table S4.** Experimental transition frequencies of the observed parent species of isomer **I** of the DEFS- $\text{CH}_2\text{F}_2$  complex.

**Figure S1** Shapes and relative energies ( $\Delta E_0$  in  $\text{kJ mol}^{-1}$ ) of the five most stable isomers of DEES- $\text{CH}_2\text{F}_2$  calculated at the B3LYP-D3(BJ)/def2-TZVP level of theory.

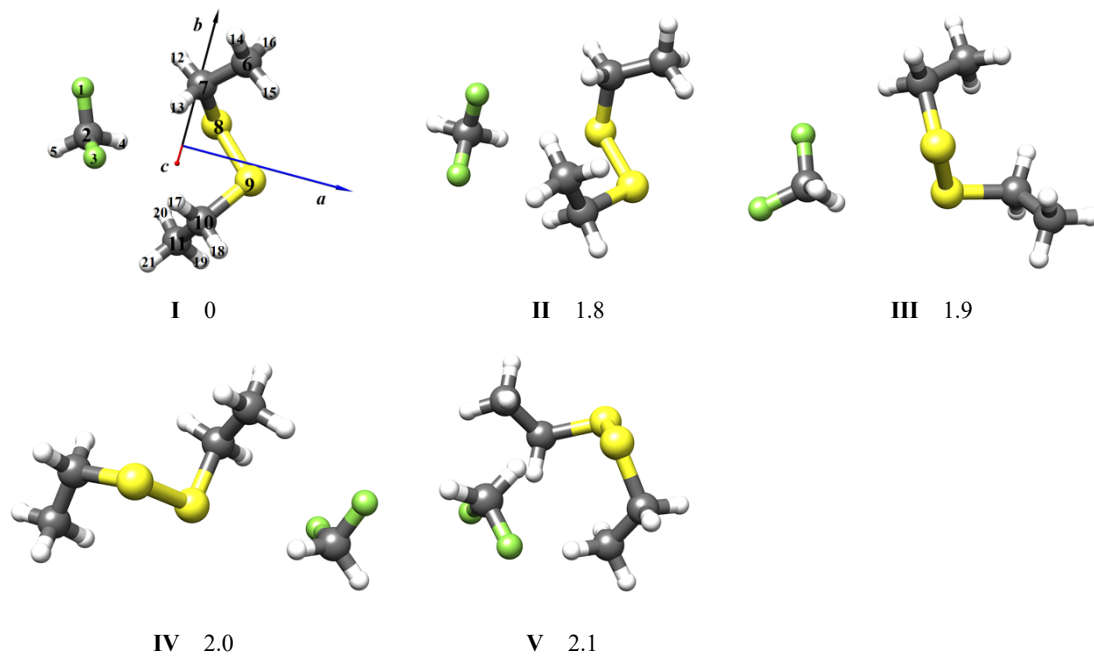

**Table S1.** Spectroscopic parameters of the energy minima of the DEFS-CH<sub>2</sub>F<sub>2</sub> complex calculated at the B3LYP-D3(BJ)/def2-TZVP level of theory.

| isomer     | $\Delta E_0$ /kJ·mol <sup>-1</sup> | <i>A</i> /MHz | <i>B</i> /MHz | <i>C</i> /MHz | $\mu_a$ / Debye | $\mu_b$ / Debye | $\mu_c$ / Debye |
|------------|------------------------------------|---------------|---------------|---------------|-----------------|-----------------|-----------------|
| <b>I</b>   | 0.0                                | 1074          | 748           | 513           | 1.2             | 1.3             | 0.1             |
| <b>II</b>  | 1.8                                | 1212          | 663           | 532           | 0.9             | 1.0             | 0.2             |
| <b>III</b> | 1.9                                | 1417          | 509           | 419           | 3.2             | 0.6             | 0.3             |
| <b>IV</b>  | 2.0                                | 2011          | 427           | 406           | 1.2             | 0.4             | 0.5             |
| <b>V</b>   | 2.1                                | 1161          | 721           | 537           | 0.9             | 0.7             | 0               |

**Table S2** Partial  $r_0$  and B3LYP-D3(BJ)/def2-TZVP calculated geometries of the observed isomer **I** of DEDS-CH<sub>2</sub>F<sub>2</sub>.

| Bond lengths/Å |                 | Angles/°  |                | Dihedral angles/° |          |
|----------------|-----------------|-----------|----------------|-------------------|----------|
| F1C2           | 1.347           |           |                |                   |          |
| F3C2           | 1.344           | F3C2F1    | 107.749        |                   |          |
| H4F2           | 1.097           | H4F2C3    | 108.951        | H4F2C3F1          | 117.742  |
| H5C2           | 1.099           | H5C2H4    | 113.775        | H5C2H4F3          | -121.645 |
| C6H5           | 4.715           | C6H5C2    | 106.343        | C6H5C2F3          | -55.806  |
| C7C6           | 1.512           | C7C6H5    | 8.789          | C7C6H5C2          | 16.074   |
| S8C2           | <b>3.522(6)</b> | S28C2F1   | <b>83.9(3)</b> | S28C2F1F3         | 98.324   |
| S9S8           | 2.026           | S9S8C7    | 102.567        | S9S8C7C6          | 67.160   |
| C10S9          | 1.835           | C10S9S8   | 102.464        | C10S9S8C7         | 90.744   |
| C11C10         | 1.513           | C11C10S9  | 111.674        | C11C10S9S8        | 71.729   |
| S12C7          | 1.089           | S12C7S8   | 104.494        | S12C7S8S9         | -171.955 |
| H13C7          | 1.089           | H13C7S8   | 107.554        | H13C7S8S9         | -55.823  |
| H14C6          | 1.088           | H14C6C7   | 109.942        | H14C6C7S8         | -179.765 |
| H15C6          | 1.089           | H15C6C7   | 110.358        | H15C6C7S8         | -59.922  |
| H16C6          | 1.087           | H16C6C7   | 110.442        | H16C6C7S8         | 60.101   |
| H17C10         | 1.089           | H17C10S9  | 107.849        | H17C10S9S8        | -51.391  |
| H18C10         | 1.088           | H18C10S9  | 104.250        | H18C10S9S8        | -167.531 |
| H19C11         | 1.087           | H19C11C9  | 110.474        | H19C11C9S9        | 61.226   |
| H20C11         | 1.088           | H20C11C10 | 110.331        | H20C11C10S9       | -58.658  |

The parameters in bold have been modified to reproduce the experimental values of rotational constants, uncertainties (in parentheses) are given in units of the last digit. Their theoretical values are: 3.522 Å, and 83.9°.

**Table S3.** NBO stabilization energy contributions ( $\geq 0.21$  kJ/mol) for the isomer **I** of the DEDES- $\text{CH}_2\text{F}_2$  complex calculated at B3LYP-D3(BJ)/def2-TZVP level of theory.

| Donor NBO                             | Acceptor NBO  | $E^{(2)}$ [kJ·mol <sup>-1</sup> ] |
|---------------------------------------|---------------|-----------------------------------|
| From DEDES to $\text{CH}_2\text{F}_2$ |               |                                   |
| BD(1)C11-H20                          | BD*(1)C2-H4   | 0.33                              |
| BD(1)C10-H17                          | RY*(1)F3      | 1.72                              |
| BD(1)C7-H13                           | RY*(1)F3      | 0.25                              |
| BD(1)C7-H13                           | RY*(2)F3      | 0.50                              |
| BD(1)C7-H12                           | RY*(1)F1      | 0.25                              |
| LP(1)S8                               | BD*(1)C2-H4   | 1.17                              |
| LP(2)S8                               | BD*(1)C2-H4   | 6.07                              |
| From $\text{CH}_2\text{F}_2$ to DEDES |               |                                   |
| BD(1)C2-H4                            | RY*(5)S8      | 0.33                              |
| BD(1)C2-H4                            | BD*(1)C10-H17 | 0.33                              |
| BD(1)C2-H4                            | BD*(1)C7-C6   | 0.25                              |
| LP(2)F3                               | BD*(1)C10-H17 | 0.84                              |
| LP(2)F3                               | BD*(1)C7-H13  | 0.38                              |
| LP(2)F1                               | BD*(1)C7-C6   | 0.33                              |

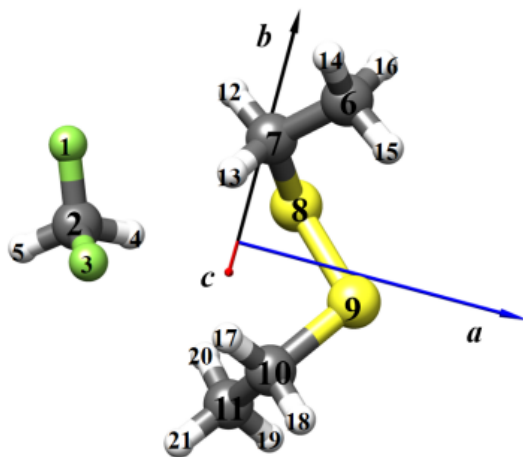

**Table S4.** Experimental transition frequencies of the observed parent species of isomer I of the DEFS-CH<sub>2</sub>F<sub>2</sub> complex.

| $J'$ | $K_a'$ | $K_c'$ | $J''$ | $K_a''$ | $K_c''$ | $\nu_{\text{obs}}/\text{MHz}$ | $\Delta\nu_{\text{obs-calc}} (\text{MHz})$ |
|------|--------|--------|-------|---------|---------|-------------------------------|--------------------------------------------|
| 6    | 0      | 6      | 5     | 1       | 5       | 6454.4444                     | -0.0026                                    |
| 6    | 1      | 6      | 5     | 1       | 5       | 6457.6650                     | 0.0022                                     |
| 6    | 0      | 6      | 5     | 0       | 5       | 6465.0527                     | 0.0037                                     |
| 6    | 1      | 6      | 5     | 0       | 5       | 6468.2651                     | 0.0004                                     |
| 4    | 3      | 2      | 3     | 2       | 1       | 7133.3544                     | -0.0027                                    |
| 6    | 1      | 5      | 5     | 2       | 4       | 7037.2080                     | -0.0002                                    |
| 6    | 2      | 5      | 5     | 2       | 4       | 7136.8978                     | 0.0012                                     |
| 6    | 1      | 5      | 5     | 1       | 4       | 7275.9995                     | 0.0013                                     |
| 7    | 0      | 7      | 6     | 1       | 6       | 7474.4051                     | -0.0016                                    |
| 7    | 1      | 7      | 6     | 1       | 6       | 7475.3351                     | -0.0033                                    |
| 7    | 0      | 7      | 6     | 0       | 6       | 7477.6210                     | -0.0014                                    |
| 7    | 1      | 7      | 6     | 0       | 6       | 7478.5536                     | -0.0005                                    |
| 4    | 3      | 1      | 3     | 2       | 2       | 7614.4579                     | -0.0045                                    |
| 6    | 3      | 4      | 5     | 3       | 3       | 7588.4754                     | 0.0003                                     |
| 6    | 4      | 3      | 5     | 4       | 2       | 7718.1304                     | 0.0016                                     |
| 6    | 4      | 2      | 5     | 4       | 1       | 7831.1746                     | 0.0005                                     |
| 6    | 2      | 4      | 5     | 2       | 3       | 8033.6522                     | -0.0005                                    |
| 4    | 4      | 1      | 3     | 3       | 0       | 8263.2720                     | -0.0040                                    |
| 4    | 4      | 0      | 3     | 3       | 1       | 8286.4284                     | 0.0007                                     |
| 7    | 1      | 6      | 6     | 2       | 5       | 8151.9806                     | -0.0021                                    |
| 7    | 2      | 6      | 6     | 2       | 5       | 8188.7413                     | 0.0030                                     |
| 6    | 3      | 3      | 5     | 3       | 2       | 8145.0869                     | -0.0013                                    |
| 7    | 1      | 6      | 6     | 1       | 5       | 8251.6710                     | 0.0000                                     |
| 7    | 2      | 6      | 6     | 1       | 5       | 8288.4266                     | 0.0000                                     |
| 7    | 2      | 5      | 6     | 3       | 4       | 8307.7745                     | 0.0015                                     |
| 8    | 0      | 8      | 7     | 1       | 7       | 8491.1707                     | -0.0004                                    |
| 8    | 1      | 8      | 7     | 1       | 7       | 8491.4350                     | 0.0027                                     |
| 8    | 0      | 8      | 7     | 0       | 7       | 8492.1016                     | -0.0011                                    |
| 8    | 1      | 8      | 7     | 0       | 7       | 8492.3657                     | 0.0017                                     |
| 7    | 3      | 5      | 6     | 3       | 4       | 8757.3007                     | -0.0026                                    |
| 7    | 4      | 4      | 6     | 4       | 3       | 9011.2919                     | -0.0017                                    |
| 7    | 2      | 5      | 6     | 2       | 4       | 9130.8605                     | -0.0006                                    |
| 7    | 5      | 2      | 6     | 5       | 1       | 9046.6522                     | 0.0006                                     |
| 8    | 1      | 7      | 7     | 2       | 6       | 9207.2809                     | -0.0033                                    |
| 8    | 2      | 7      | 7     | 2       | 6       | 9219.7757                     | 0.0018                                     |
| 8    | 1      | 7      | 7     | 1       | 6       | 9244.0413                     | 0.0015                                     |
| 8    | 2      | 7      | 7     | 1       | 6       | 9256.5298                     | 0.0004                                     |
| 5    | 4      | 2      | 4     | 3       | 1       | 9462.1007                     | 0.0000                                     |

---

|    |   |    |    |   |    |            |         |
|----|---|----|----|---|----|------------|---------|
| 5  | 3 | 2  | 4  | 2 | 3  | 9359.5440  | 0.0014  |
| 7  | 4 | 3  | 6  | 4 | 2  | 9310.9200  | -0.0013 |
| 5  | 4 | 1  | 4  | 3 | 2  | 9618.8327  | 0.0007  |
| 9  | 0 | 9  | 8  | 1 | 8  | 9506.9530  | -0.0008 |
| 9  | 1 | 9  | 8  | 1 | 8  | 9507.0269  | 0.0016  |
| 9  | 0 | 9  | 8  | 0 | 8  | 9507.2120  | -0.0029 |
| 9  | 1 | 9  | 8  | 0 | 8  | 9507.2882  | 0.0018  |
| 7  | 3 | 4  | 6  | 3 | 3  | 9560.1412  | -0.0013 |
| 8  | 2 | 6  | 7  | 3 | 5  | 9665.0760  | 0.0008  |
| 8  | 3 | 6  | 7  | 3 | 5  | 9872.5057  | -0.0001 |
| 8  | 2 | 6  | 7  | 2 | 5  | 10114.6078 | 0.0021  |
| 5  | 5 | 1  | 4  | 4 | 0  | 10455.6556 | -0.0009 |
| 5  | 5 | 0  | 4  | 4 | 1  | 10460.1060 | -0.0016 |
| 8  | 3 | 6  | 7  | 2 | 5  | 10322.0376 | 0.0012  |
| 9  | 1 | 8  | 8  | 2 | 7  | 10236.6801 | 0.0009  |
| 9  | 2 | 8  | 8  | 2 | 7  | 10240.6904 | 0.0013  |
| 9  | 1 | 8  | 8  | 1 | 7  | 10249.1685 | -0.0002 |
| 9  | 2 | 8  | 8  | 1 | 7  | 10253.1814 | 0.0027  |
| 6  | 4 | 3  | 5  | 3 | 2  | 10516.9884 | -0.0022 |
| 10 | 1 | 10 | 9  | 1 | 9  | 10522.4672 | 0.0019  |
| 10 | 0 | 10 | 9  | 0 | 9  | 10522.5190 | 0.0014  |
| 8  | 5 | 3  | 7  | 5 | 2  | 10457.9832 | -0.0037 |
| 8  | 3 | 5  | 7  | 3 | 4  | 10848.7675 | 0.0004  |
| 9  | 2 | 7  | 8  | 3 | 6  | 10859.3692 | -0.0009 |
| 8  | 4 | 4  | 7  | 4 | 3  | 10837.5268 | 0.0017  |
| 9  | 3 | 7  | 8  | 3 | 6  | 10943.4428 | 0.0029  |
| 6  | 4 | 2  | 5  | 3 | 3  | 11083.2073 | -0.0022 |
| 9  | 2 | 7  | 8  | 2 | 6  | 11066.7987 | -0.0021 |
| 9  | 3 | 7  | 8  | 2 | 6  | 11150.8754 | 0.0048  |
| 10 | 1 | 9  | 9  | 2 | 8  | 11256.2717 | -0.0021 |
| 10 | 2 | 9  | 9  | 2 | 8  | 11257.5089 | 0.0006  |
| 10 | 1 | 9  | 9  | 1 | 8  | 11260.2818 | -0.0019 |
| 10 | 2 | 9  | 9  | 1 | 8  | 11261.5190 | 0.0007  |
| 6  | 5 | 2  | 5  | 4 | 1  | 11707.1621 | 0.0000  |
| 9  | 4 | 6  | 8  | 4 | 5  | 11466.8408 | -0.0006 |
| 6  | 5 | 1  | 5  | 4 | 2  | 11746.4158 | -0.0010 |
| 11 | 0 | 11 | 10 | 0 | 10 | 11537.8637 | -0.0006 |
| 11 | 1 | 11 | 10 | 0 | 10 | 11537.8637 | -0.0056 |
| 9  | 5 | 5  | 8  | 5 | 4  | 11663.5509 | -0.0001 |
| 8  | 4 | 5  | 7  | 3 | 4  | 12089.0137 | 0.0004  |
| 9  | 3 | 6  | 8  | 3 | 5  | 11980.8194 | 0.0007  |
| 10 | 2 | 8  | 9  | 3 | 7  | 11953.5133 | -0.0015 |
| 10 | 3 | 8  | 9  | 3 | 7  | 11984.6674 | 0.0026  |
| 10 | 2 | 8  | 9  | 2 | 7  | 12037.5865 | 0.0019  |

---



---

|    |   |    |    |   |    |            |         |
|----|---|----|----|---|----|------------|---------|
| 10 | 3 | 8  | 9  | 2 | 7  | 12068.7353 | 0.0008  |
| 9  | 5 | 4  | 8  | 5 | 3  | 11953.8897 | 0.0028  |
| 11 | 1 | 10 | 10 | 2 | 9  | 12272.5607 | 0.0010  |
| 11 | 2 | 10 | 10 | 2 | 9  | 12272.9282 | 0.0006  |
| 11 | 1 | 10 | 10 | 1 | 9  | 12273.7947 | 0.0005  |
| 11 | 2 | 10 | 10 | 1 | 9  | 12274.1626 | 0.0006  |
| 6  | 6 | 1  | 5  | 5 | 0  | 12640.1312 | -0.0002 |
| 6  | 6 | 0  | 5  | 5 | 1  | 12640.9101 | 0.0026  |
| 10 | 3 | 7  | 9  | 4 | 6  | 12246.1777 | -0.0009 |
| 9  | 4 | 5  | 8  | 4 | 4  | 12312.3439 | 0.0019  |
| 9  | 4 | 6  | 8  | 3 | 5  | 12707.0899 | 0.0022  |
| 12 | 0 | 12 | 11 | 1 | 11 | 12553.2012 | 0.0008  |
| 12 | 1 | 12 | 11 | 1 | 11 | 12553.2012 | -0.0004 |
| 12 | 0 | 12 | 11 | 0 | 11 | 12553.2012 | -0.0041 |
| 12 | 1 | 12 | 11 | 0 | 11 | 12553.2012 | -0.0055 |
| 10 | 4 | 7  | 9  | 4 | 6  | 12609.3577 | 0.0002  |
| 7  | 5 | 3  | 6  | 4 | 2  | 12890.4032 | 0.0014  |
| 7  | 4 | 3  | 6  | 3 | 4  | 12805.6563 | 0.0004  |
| 7  | 5 | 2  | 6  | 4 | 3  | 13074.9384 | -0.0012 |
| 10 | 3 | 7  | 9  | 3 | 6  | 12972.4481 | 0.0004  |
| 10 | 7 | 4  | 9  | 7 | 3  | 12900.5822 | 0.0025  |
| 11 | 2 | 9  | 10 | 3 | 8  | 12998.7861 | -0.0004 |
| 10 | 5 | 6  | 9  | 5 | 5  | 12946.6713 | -0.0012 |
| 10 | 7 | 3  | 9  | 7 | 2  | 12908.8714 | -0.0017 |
| 11 | 3 | 9  | 10 | 3 | 8  | 13009.6217 | 0.0024  |
| 11 | 2 | 9  | 10 | 2 | 8  | 13029.9359 | -0.0005 |
| 11 | 3 | 9  | 10 | 2 | 8  | 13040.7722 | 0.0030  |
| 10 | 6 | 5  | 9  | 6 | 4  | 12980.5440 | -0.0002 |
| 10 | 4 | 7  | 9  | 3 | 6  | 13335.6279 | 0.0014  |
| 12 | 1 | 11 | 11 | 2 | 10 | 13287.8447 | -0.0041 |
| 12 | 2 | 11 | 11 | 2 | 10 | 13287.9552 | -0.0004 |
| 12 | 1 | 11 | 11 | 1 | 10 | 13288.2160 | -0.0007 |
| 12 | 2 | 11 | 11 | 1 | 10 | 13288.3269 | 0.0033  |
| 13 | 0 | 13 | 12 | 1 | 12 | 13568.5211 | 0.0012  |
| 13 | 1 | 13 | 12 | 1 | 12 | 13568.5211 | 0.0009  |
| 13 | 0 | 13 | 12 | 0 | 12 | 13568.5211 | 0.0000  |
| 13 | 1 | 13 | 12 | 0 | 12 | 13568.5211 | -0.0003 |
| 7  | 6 | 2  | 6  | 5 | 1  | 13907.3695 | -0.0024 |
| 7  | 6 | 1  | 6  | 5 | 2  | 13915.7728 | -0.0001 |
| 8  | 5 | 4  | 7  | 4 | 3  | 13925.0661 | 0.0000  |
| 10 | 5 | 5  | 9  | 5 | 4  | 13514.2689 | -0.0030 |
| 10 | 4 | 6  | 9  | 4 | 5  | 13656.8496 | -0.0021 |
| 11 | 4 | 8  | 10 | 4 | 7  | 13700.0514 | -0.0012 |
| 11 | 3 | 8  | 10 | 3 | 7  | 13904.1832 | -0.0021 |

---

---

|    |   |    |    |   |    |            |         |
|----|---|----|----|---|----|------------|---------|
| 11 | 4 | 8  | 10 | 3 | 7  | 14063.2327 | 0.0013  |
| 12 | 2 | 10 | 11 | 3 | 9  | 14023.6359 | 0.0022  |
| 12 | 3 | 10 | 11 | 3 | 9  | 14027.2247 | -0.0012 |
| 12 | 2 | 10 | 11 | 2 | 9  | 14034.4684 | 0.0020  |
| 12 | 3 | 10 | 11 | 2 | 9  | 14038.0582 | -0.0004 |
| 11 | 5 | 7  | 10 | 5 | 6  | 14177.0312 | 0.0002  |
| 13 | 1 | 12 | 12 | 2 | 11 | 14302.8788 | -0.0022 |
| 13 | 2 | 12 | 12 | 2 | 11 | 14302.9068 | -0.0046 |
| 13 | 1 | 12 | 12 | 1 | 11 | 14302.9817 | -0.0061 |
| 13 | 2 | 12 | 12 | 1 | 11 | 14303.0122 | -0.0060 |
| 11 | 7 | 5  | 10 | 7 | 4  | 14256.2751 | -0.0030 |
| 8  | 5 | 3  | 7  | 4 | 4  | 14521.6317 | -0.0012 |
| 11 | 6 | 6  | 10 | 6 | 5  | 14319.6627 | -0.0017 |
| 9  | 5 | 5  | 8  | 4 | 4  | 14751.0905 | -0.0015 |
| 7  | 7 | 1  | 6  | 6 | 0  | 14822.8989 | 0.0048  |
| 7  | 7 | 0  | 6  | 6 | 1  | 14823.0258 | 0.0045  |
| 14 | 0 | 14 | 13 | 1 | 13 | 14583.8047 | 0.0033  |
| 14 | 1 | 14 | 13 | 1 | 13 | 14583.8047 | 0.0032  |
| 14 | 0 | 14 | 13 | 0 | 13 | 14583.8047 | 0.0029  |
| 14 | 1 | 14 | 13 | 0 | 13 | 14583.8047 | 0.0028  |
| 12 | 3 | 9  | 11 | 4 | 8  | 14689.5769 | -0.0008 |
| 12 | 4 | 9  | 11 | 4 | 8  | 14752.8438 | -0.0007 |
| 11 | 6 | 5  | 10 | 6 | 4  | 14592.5027 | -0.0033 |
| 11 | 4 | 7  | 10 | 4 | 6  | 14833.0469 | 0.0020  |
| 12 | 3 | 9  | 11 | 3 | 8  | 14848.6210 | -0.0028 |
| 12 | 4 | 9  | 11 | 3 | 8  | 14911.8927 | 0.0020  |
| 8  | 6 | 3  | 7  | 5 | 2  | 15150.2324 | -0.0007 |
| 8  | 4 | 4  | 7  | 3 | 5  | 14885.8772 | -0.0003 |
| 8  | 6 | 2  | 7  | 5 | 3  | 15198.6238 | -0.0009 |
| 13 | 2 | 11 | 12 | 3 | 10 | 15040.9585 | -0.0004 |
| 13 | 2 | 11 | 12 | 2 | 10 | 15044.5530 | 0.0017  |
| 13 | 3 | 11 | 12 | 2 | 10 | 15045.7002 | 0.0013  |
| 10 | 5 | 6  | 9  | 4 | 5  | 15385.4174 | -0.0052 |
| 11 | 5 | 6  | 10 | 5 | 5  | 15046.0991 | 0.0019  |
| 8  | 4 | 4  | 7  | 2 | 5  | 15335.4112 | 0.0032  |
| 12 | 5 | 8  | 11 | 5 | 7  | 15346.3259 | -0.0025 |
| 15 | 0 | 15 | 14 | 0 | 14 | 15599.0409 | 0.0000  |
| 15 | 0 | 15 | 14 | 1 | 14 | 15599.0409 | 0.0001  |
| 15 | 1 | 15 | 14 | 0 | 14 | 15599.0409 | 0.0000  |
| 15 | 1 | 15 | 14 | 1 | 14 | 15599.0409 | 0.0001  |
| 12 | 6 | 7  | 11 | 6 | 6  | 15628.1182 | -0.0029 |
| 8  | 7 | 1  | 7  | 6 | 2  | 16095.7944 | 0.0009  |
| 12 | 4 | 8  | 11 | 4 | 7  | 15844.6333 | 0.0019  |
| 13 | 4 | 10 | 12 | 4 | 9  | 15782.8168 | 0.0025  |

---

|    |   |    |    |   |    |            |         |
|----|---|----|----|---|----|------------|---------|
| 13 | 3 | 10 | 12 | 3 | 9  | 15822.5878 | 0.0033  |
| 13 | 4 | 10 | 12 | 3 | 9  | 15846.0794 | -0.0017 |
| 12 | 7 | 5  | 11 | 7 | 4  | 15718.3724 | 0.0032  |
| 9  | 6 | 4  | 8  | 5 | 3  | 16324.1189 | 0.0019  |
| 9  | 5 | 4  | 8  | 4 | 5  | 16209.5654 | 0.0054  |
| 9  | 6 | 3  | 8  | 5 | 4  | 16517.8337 | 0.0004  |
| 15 | 1 | 14 | 14 | 2 | 13 | 16332.8482 | 0.0093  |
| 15 | 2 | 14 | 14 | 2 | 13 | 16332.8482 | 0.0069  |
| 15 | 1 | 14 | 14 | 1 | 13 | 16332.8482 | 0.0008  |
| 15 | 2 | 14 | 14 | 1 | 13 | 16332.8482 | -0.0015 |
| 8  | 8 | 1  | 7  | 7 | 0  | 17005.2561 | 0.0004  |
| 8  | 8 | 0  | 7  | 7 | 1  | 17005.2696 | -0.0060 |
| 16 | 0 | 16 | 15 | 0 | 15 | 16614.2342 | 0.0008  |
| 16 | 0 | 16 | 15 | 1 | 15 | 16614.2342 | 0.0009  |
| 16 | 1 | 16 | 15 | 0 | 15 | 16614.2342 | 0.0008  |
| 16 | 1 | 16 | 15 | 1 | 15 | 16614.2342 | 0.0009  |
